# Supplementary material for: Increased RNAi Efficiency by dsEGFP-Induced Up-Regulation of Two Core RNAi Pathway Genes (OfDicer2 and OfAgo2) in the Asian Corn Borer (Ostrinia furnacalis)
Source: MDPI journal article supplement (doi:10.3390/insects13030274), 2022-03-10
Supplement: s1 [file s1]

Table S1. Primers for PCR amplification, dsRNA synthesis and RT-qPCR analysis

| Application of primers | Gene name       | Sequence of primers (5' -3' )                                                                | Product size (bp) |
|------------------------|-----------------|----------------------------------------------------------------------------------------------|-------------------|
| cDNA sequencing        | <i>OfAgo1</i>   | F: AGTGGGTGGCTCAGGTGTCA<br>R: GAAGTCGAACTCGGTGGGGT                                           | 1862              |
|                        | <i>OfAgo2</i>   | F: GAGGAAAGGAAAGCTGCTCTGA<br>R: AAGCCTGTTTCATTACTTACTGAT                                     | 4538              |
|                        | <i>OfAgo3</i>   | F: GACGTGATAATGGCGGATCCTA<br>R: TAACTCACAATCAACTTATTTTCGT                                    | 2866              |
|                        | <i>OfDicer1</i> | F: CTGTTGGATGTGGACCATACGA<br>R: GTCCCTTTAGCAATGCGATA                                         | 3056              |
|                        | <i>OfDicer2</i> | F: CAGTCCTAAGTATTATAACTCGCC<br>R: TGCATGTGACACGCAAAATTAG                                     | 4389              |
|                        | <i>OfR2D2</i>   | F: CTGTGTAGATAGGTGCTCATT<br>R: TAAATACTGTTAGACAGCATAA                                        | 1575              |
|                        | <i>EGFP</i>     | F: taatacgactcactatagggagcTAAACGGCCACAAGTT<br>R: taatacgactcactatagggTGTCTGCTGGTAGTGGTCG     | 496               |
| dsRNA synthesis        | <i>OfAgo1</i>   | F: taatacgactcactatagggAAGAGGCATTAGAAGGGCGT<br>R: taatacgactcactatagggTGCAGTGGAAATGATTGCAT   | 460               |
|                        | <i>OfAgo2</i>   | F: taatacgactcactatagggCAAACCTGCCCCGAATATTCT<br>R: taatacgactcactatagggCAGTCTCGTGTGATGTCGCT  | 480               |
|                        | <i>OfAgo3</i>   | F: taatacgactcactatagggTGGGGCTCCTACATTACAGTC<br>R: taatacgactcactatagggACCAAGTTCATGGCCCTCATC | 496               |
|                        | <i>OfDicer1</i> | F: taatacgactcactatagggCATCTGTCACCCACCACAAG<br>R: taatacgactcactatagggTCCAAATCGGGCTGATAGTC   | 478               |
|                        | <i>OfDicer2</i> | F: taatacgactcactatagggCGTGCTGTGGTACAAGGCTA<br>R: taatacgactcactatagggTAATATAGCCGCGGAAGTGG   | 496               |
|                        | <i>OfR2D2</i>   | F: taatacgactcactatagggGGAGATGGAGTCGTTACCCA<br>R: taatacgactcactatagggCCTGACGCTTAGCCAGTTTC   | 500               |
|                        | <i>OfEf1α</i>   | F: taatacgactcactatagggCCGGTACCATCGTCGTATTC<br>R: taatacgactcactatagggACGGTCTGTCTCATGTCACG   | 480               |
|                        | <i>OfCTP8</i>   | F: taatacgactcactatagggACTGTAGTCGAAATGCGTCT<br>R: taatacgactcactatagggAAACTCCGAAGGGCAGATAG   | 496               |
|                        | <i>OfAgo1</i>   | F: GGTCAGGAACACAAGCACACAT<br>R: GGTTGTTGATTTACGCTCTCT                                        | 154               |
|                        | <i>OfAgo2</i>   | F: CCCAGAACAACAACACTGAACGATT<br>R: ACTGGTGATGACATCCTGGATCTT                                  | 104               |
| RT-qPCR analysis       | <i>OfAgo3</i>   | F: TTGGAAACGGGCTATGAACG<br>R: TCACCTCTCCCTTTTCATTTTT                                         | 140               |
|                        | <i>OfDicer1</i> | F: GTTCCAACTTGAACCTCTACC<br>R: AGGTTGTGTATGTGTGAGAGGC                                        | 132               |
|                        | <i>OfDicer2</i> | F: GACAAGGTGCCTCCCTACATCA<br>R: TGATGTAGGGAGGCACCTTGTC                                       | 228               |
|                        | <i>OfR2D2</i>   | F: AGGACAACCCGCCAGAGT<br>R: TGTGAAACTGCGACACCTTG                                             | 128               |
|                        | <i>OfEf1α</i>   | F: GGGTTCCTTCAAATATGCCTGG<br>R: GCCTGAGAGGTTCTGTGAT                                          | 174               |
|                        | <i>OfCTP8</i>   | F: ATCCAGCCAATCGCGCTGCC<br>R: GCTGACCACCGAGGATGCGC                                           | 123               |
|                        | <i>OfRpS3</i>   | F: GCGTTTCAACATCCCTGAAC<br>R: CACACCATAGCAGGCACGA                                            | 143               |
